# Supplementary figures and images for: The role of ST3GAL4 in glioma malignancy, macrophage infiltration, and prognostic outcomes
Source: PubMed Central journal article supplement — Heliyon. 2024 Apr 23;10(9):e29829. doi: 10.1016/j.heliyon.2024.e29829 (PMC11066652; doi:10.1016/j.heliyon.2024.e29829), 2024-04-23

Source figure 3A

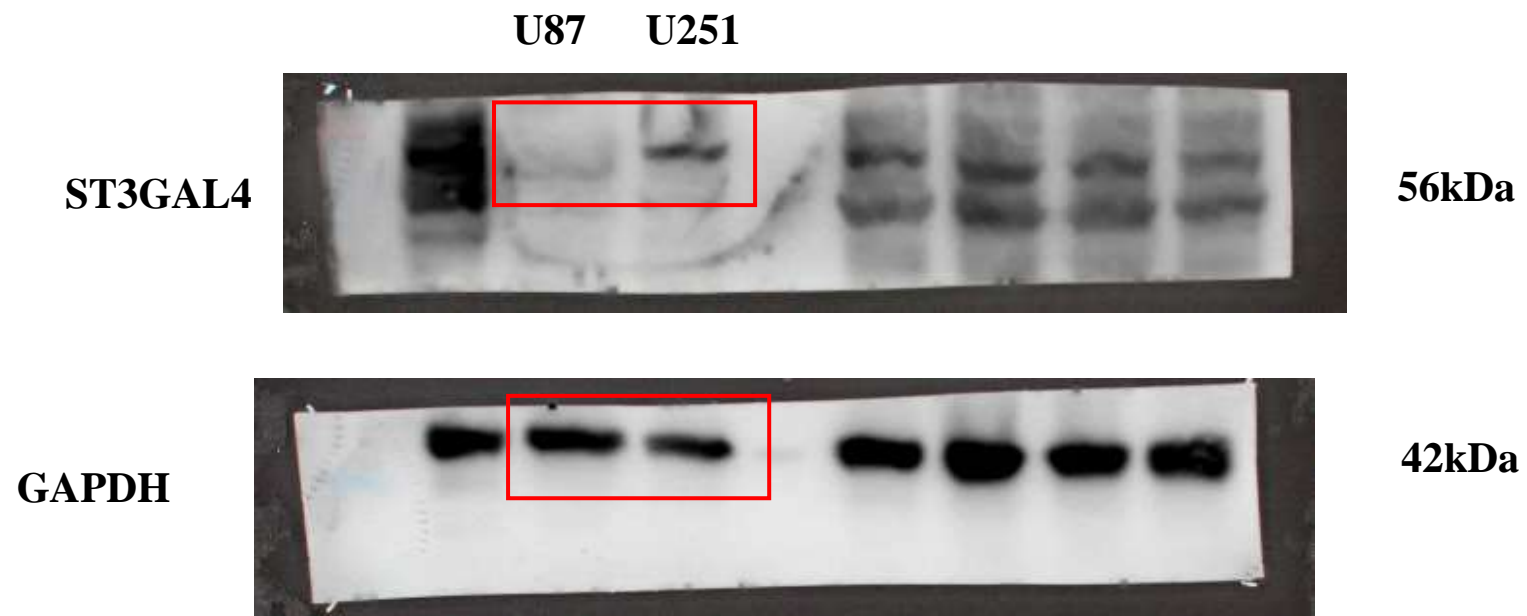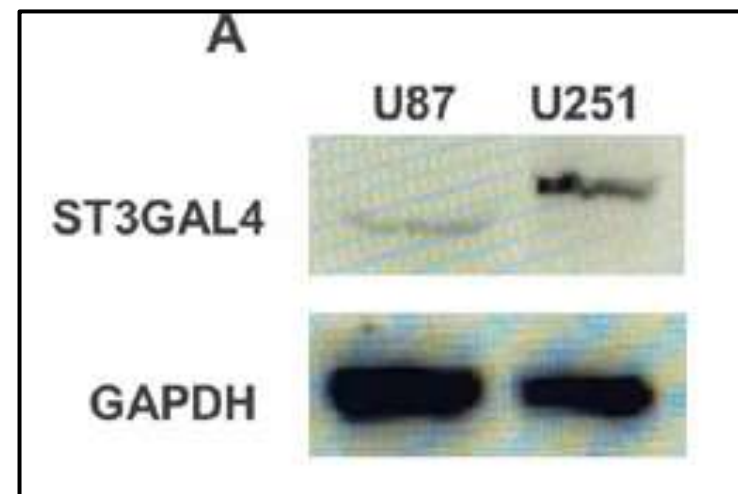

Source figure 3D

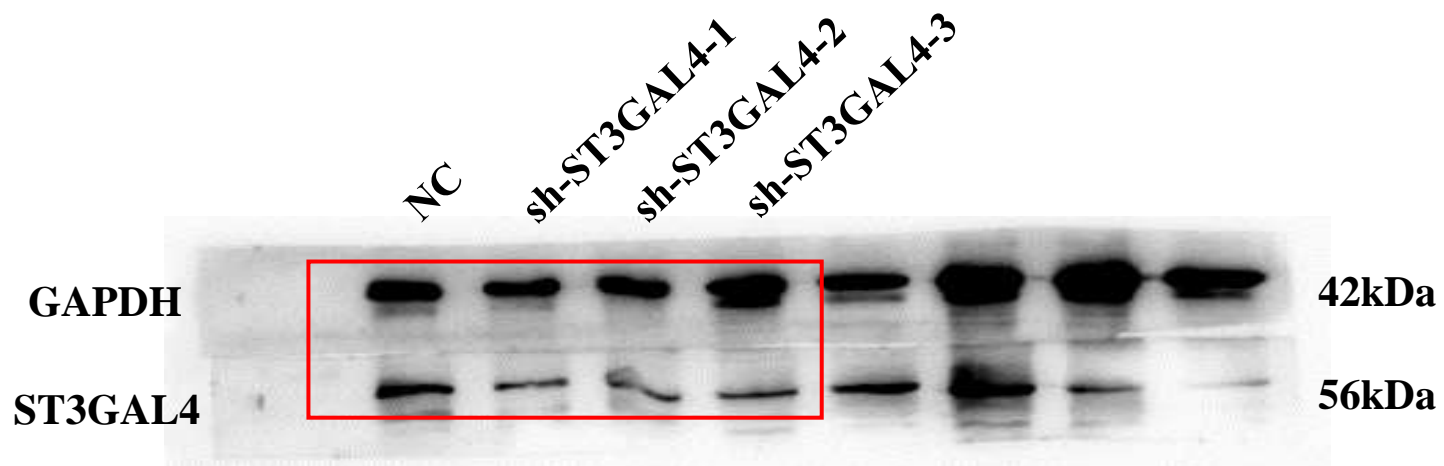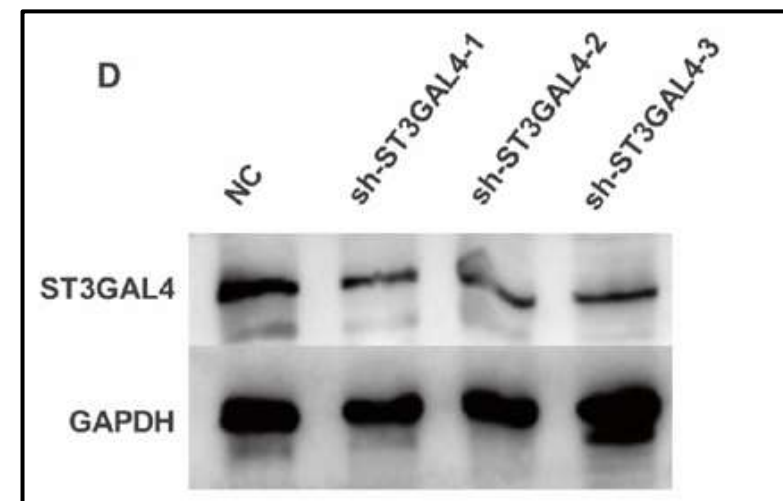

Source figure 5D

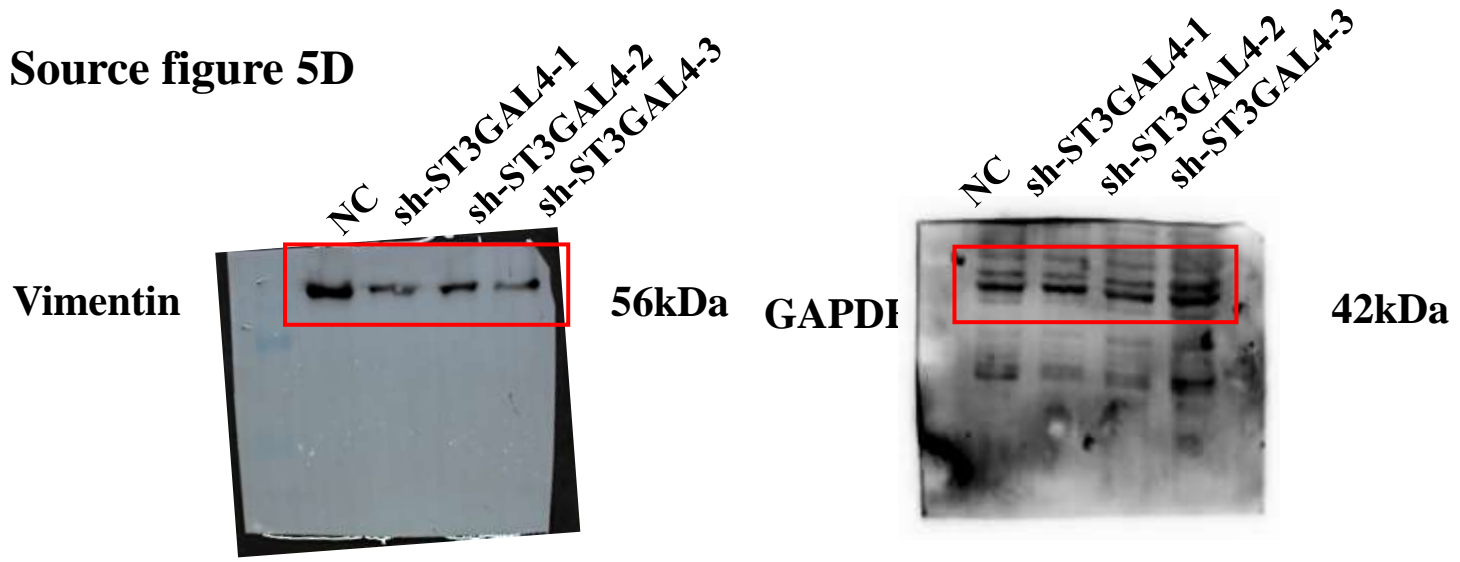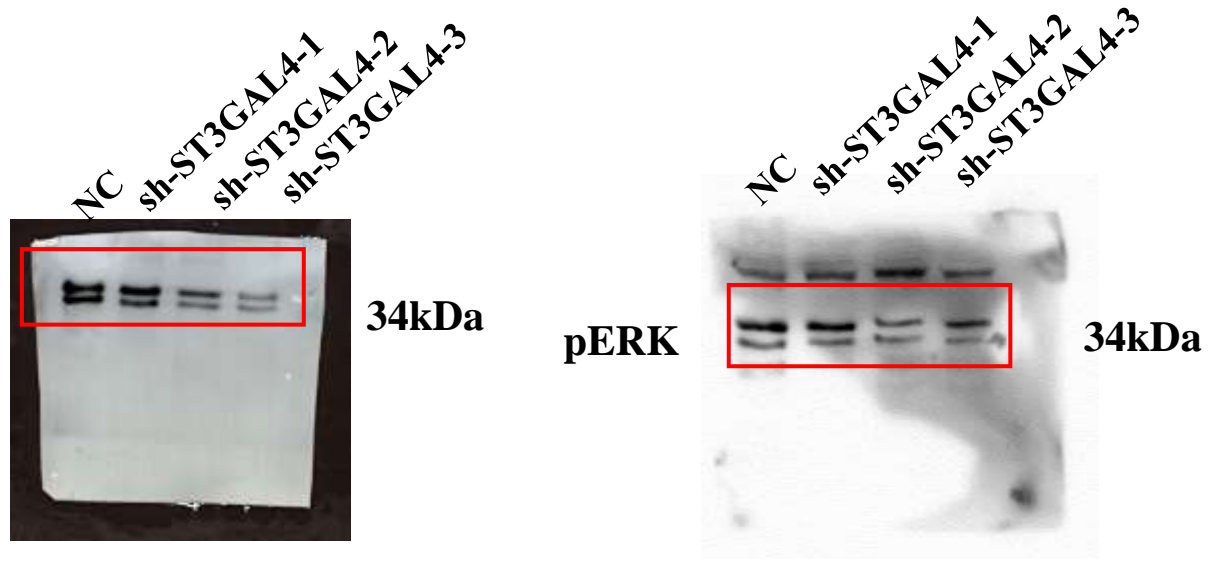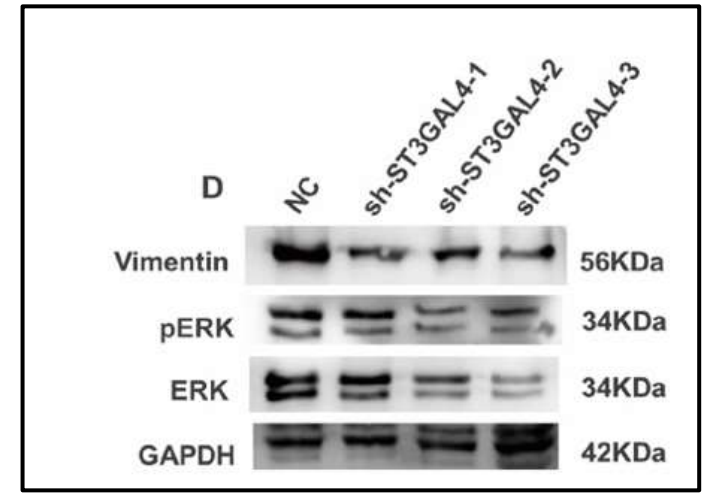

Supplement: mmc1.pdf [file mmc1.pdf]
